# Supplementary material for: Morphometric analysis of odontoid process among Arab population: a retrospective cone beam CT study
Source: PeerJ. 2023 May 23;11:e15411. doi: 10.7717/peerj.15411 (PMC10215736; doi:10.7717/peerj.15411)
Supplement: Supplemental Information 1 [file peerj-11-15411-s001.xlsx]

## Sheet: Sheet1
DOX-Ray	Gender	MITD (Mean int tran diam)	METD (Mean int tran diam)	MIAP (Mean int anteropostdiam)	MEAP (MeanExt anteropostdiam)	AI angel	LI	HOCG	CL Clivus length	OCHR occip condyle height	OCH(L)	DBIAM int acc dist	DBCG&ATC dist cresta gali and ant tub sella	CCA (cliv canal angle)	BA	WORALOC	TDOFM	PH	PW
13\10\2015	f	3.68mm	5.98mm	7.04mm	9.12mm	64.6	33.74mm	13.63mm	38.62mm	9.06mm	9.08mm	61.11mm	34.50mm	153.3	121.4	24.69mm	28.05mm	17.47mm	32.96mm
31\8\2016	f	4.04mm	5.83mm	6.92mm	9.88mm	59.5	35.69mm	10.36mm	47.51mm	10.21mm	10.21mm	60.36mm	33.11mm	147.6	114.3	23.14mm	29.59mm	16.81mm	34.29mm
21\4\2014	m	4.55mm	6.44mm	7.65mm	10.32mm	58.8	36.68mm	13.60mm	40.61mm	10.51mm	10.51mm	59.86mm	35.68mm	160.9	111.8	26.67mm	25.58mm	13.46mm	31.26mm
11\11\2014	f	4.72mm	7.27mm	8.50mm	10.51mm	64.7	35.19mm	8.54mm	43.60mm	10.82mm	10.85mm	56.80mm	32.94mm	164.6	121.4	21.62mm	25.24mm	12.71mm	29.55mm
11\9\2012	m	4.78mm	7.00mm	7.70mm	11.88mm	61.9	42.96mm	7.69mm	46.63mm	8.68mm	8.65mm	63.45mm	34.26mm	167.5	116.2	23.58mm	28.45mm	19.06mm	31.17mm
14\1\2015	m	4.85mm	6.36mm	8.95mm	11.67mm	65.2	38.98mm	7.20mm	44.48mm	9.87mm	9.86mm	61.07mm	35.00mm	150.5	122.4	23.51mm	30.16mm	19.44mm	36.18mm
9\11\2015	f	4.87mm	8.05mm	6.71mm	9.72mm	64.6	32.42mm	15.12mm	42.71mm	8.07mm	8.05mm	64.18mm	34.96mm	152.2	125.6	30.25mm	28.19mm	11.74mm	41.95mm
18\1\2016	f	4.89mm	8.06mm	6.20mm	9.10mm	65.3	34.58mm	12.68mm	43.09mm	10.21mm	10.25mm	57.93mm	29.91mm	168.1	122.4	24.80mm	30.52mm	12.21mm	32.50mm
28\3\2016	f	4.93mm	7.62mm	5.57mm	8.55mm	60.6	32.01mm	12.24mm	39.34mm	8.02mm	8.02mm	50.20mm	32.89mm	161.5	111.5	25.25mm	27.66mm	8.09mm	38.16mm
5\5\2014	m	4.94mm	7.32mm	7.40mm	10.07mm	59.4	38.52mm	10.90mm	45.65mm	9.59mm	9.54mm	64.48mm	39.65mm	152.8	124	20.58mm	32.46mm	17.19mm	41.06mm
21\12\2015	f	5.00mm	7.48mm	6.32mm	8.47mm	63.5	33.53mm	12.91mm	42.32mm	9.61mm	9.61mm	53.66mm	36.50mm	159.4	117.1	21.13mm	25.34mm	10.36mm	39.71mm
20\1\2016	f	5.04mm	7.65mm	6.83mm	9.10mm	68.3	34.57mm	12.29mm	42.71mm	10.17mm	10.14mm	60.88mm	29.91mm	158.6	119.4	23.05mm	25.93mm	12.51mm	37.14mm
28\5\2014	m	5.11mm	7.48mm	8.39mm	10.74mm	64.2	38.64mm	11.51mm	48.37mm	11.64mm	11.63mm	59.36mm	44.83mm	175.5	110.9	20.41mm	27.38mm	21.69mm	39.22mm
19\11\2015	f	5.16mm	6.94mm	6.53mm	9.06mm	64.2	32.72mm	10.44mm	43.45mm	10.98mm	10.98mm	58.66mm	31.53mm	172.3	111.9	23.63mm	25.68mm	15.50mm	31.47mm
3\2\2013	f	5.18mm	8.23mm	7.45mm	10.33mm	62.9	35.06mm	11.62mm	41.66mm	8.09mm	8.07mm	64.30mm	33.65mm	163.5	119.7	22.60mm	28.32mm	9.74mm	36.84mm
31\10\2011	f	5.22mm	7.46mm	7.67mm	10.49mm	63.8	35.77mm	13.31mm	40.53mm	9.12mm	9.10mm	60.46mm	39.28mm	175.9	116.5	23.28mm	30.57mm	15.16mm	31.08mm
1\3\2016	m	5.24mm	6.50mm	8.86mm	11.34mm	59.3	38.82mm	11.39mm	43.60mm	13.08mm	13.06mm	60.92mm	39.54mm	156.2	122.6	27.20mm	31.56mm	14.72mm	35.20mm
13\8\2014	m	5.24mm	7.72mm	8.33mm	10.78mm	63.5	35.92mm	13.01mm	46.08mm	11.03mm	11.04mm	47.35mm	38.03mm	151.6	120.4	23.68mm	30.85mm	14.65mm	37.47mm
22\2\2015	f	5.26mm	7.07mm	6.49mm	9.25mm	58.5	37.90mm	10.63mm	43.38mm	12.52mm	12.51mm	59.61mm	33.10mm	160.4	119.4	24.69mm	26.84mm	16.51mm	35.70mm
8\5\2016	f	5.27mm	7.82mm	6.41mm	9.51mm	64.3	32.66mm	14.04mm	41.86mm	9.77mm	9.76mm	54.68mm	32.60mm	159.5	121.8	24.64mm	27.63mm	14.48mm	32.45mm
2\3\2016	m	5.27mm	8.77mm	7.22mm	10.73mm	64.7	40.96mm	7.48mm	43.73mm	12.35mm	12.36mm	65.09mm	32.60mm	150.5	115.5	22.69mm	28.75mm	8.89mm	44.47mm
1\8\2016	m	5.28mm	7.90mm	7.29mm	9.77mm	70.6	33.55mm	10.11mm	41.58mm	8.38mm	8.39mm	69.78mm	33.46mm	157.3	114.8	24.50mm	33.08mm	16.69m	31.91mm
25\5\2016	f	5.28mm	7.69mm	8.11mm	8.92mm	60.3	33.74mm	9.14mm	41.11mm	8.75mm	8.78mm	62.34mm	33.60mm	159.4	128.1	22.59mm	29.30mm	10.73mm	33.46mm
29\5\2016	f	5.30mm	8.08mm	6.92mm	10.80mm	not clear	not clear	12.34mm	41.33mm	9.97mm	9.97mm	52.30mm	31.65mm	not clear	127	20.13mm	27.32mm	11.74mm	34.90mm
14\10\2015	f	5.31mm	7.79mm	8.28mm	11.00mm	66	31.38mm	8.30mm	37.42mm	9.23mm	9.24mm	56.35mm	32.51mm	167.7	113	22.58mm	27.65mm	12.22mm	34.53mm
24\11\2013	f	5.33mm	7.76mm	7.96mm	10.68mm	67.4	36.59mm	8.24mm	43.71mm	10.48mm	10.49mm	57.60mm	33.27mm	148.6	121.7	24.76mm	31.01mm	15.02mm	31.01mm
2014-03-03	m	5.33mm	8.81mm	8.48mm	11.81mm	65.6	36.79mm	9.68mm	44.32mm	9.54mm	9.54mm	58.84mm	36.91mm	155.1	116.3	22.4mm	30.44mm	17.79mm	34.66mm
18\11\2013	f	5.40mm	6.92mm	8.53mm	10.43mm	60.3	34.29mm	10.75mm	42.76mm	9.48mm	9.49mm	61.84mm	30.99mm	163.8	115.3	22.05mm	29.96mm	15.37mm	39.70mm
29\12\2015	m	5.40mm	8.11mm	8.39mm	10.21mm	66.6	34.07mm	3.74mm	46.03mm	11.33mm	11.35mm	60.55mm	32.89mm	155.5	119.2	23.77mm	29.71mm	14.31mm	34.30mm
11\11\2014	f	5.41mm	7.32mm	7.32mm	8.81mm	62.5	33.22mm	14.90mm	39.15mm	10.51mm	10.54mm	63.39mm	30.89mm	145.4	124.1	25.94mm	30.01mm	9.95mm	27.22mm
26\11\2014	m	5.44mm	6.63mm	7.69mm	10.03mm	63.1	31.44mm	14.69mm	45.98mm	11.93mm	11.92mm	64.34mm	31.60mm	163.1	115.1	23.27mm	29.23mm	13.59mm	31.27mm
13\1\2016	m	5.45mm	7.83mm	8.15mm	9.98mm	64.3	40.85mm	8.76mm	45.06mm	10.36mm	10.32mm	61.28mm	36.10mm	156.1	116.2	23.16mm	28.69mm	11.53mm	42.18mm
16\6\2016	f	5.49mm	7.25mm	7.27mm	10.12mm	62.8	33.22mm	6.34mm	35.80mm	9.80mm	9.80mm	59.36mm	28.69mm	152.4	128.7	26.01mm	28.34mm	14.47mm	37.30mm
26\10\2015	f	5.50mm	8.16mm	8.07mm	10.43mm	59.1	33.99mm	11.02mm	34.00mm	8.49mm	8.49mm	63.88mm	29.83mm	167.5	114.4	23.29mm	26.27mm	14.90mm	34.96mm
4\6\2012	f	5.56mm	6.26mm	6.57mm	8.66mm	65.1	32.00mm	12.58mm	40.59mm	8.51mm	8.51mm	60.60mm	31.35mm	163.1	118.4	22.39mm	27.13mm	11.46mm	35.69mm
11\12\2013	m	5.57mm	7.53mm	7.98mm	10.35mm	63.4	37.10mm	8.22mm	42.97mm	9.39mm	9.39mm	60.69mm	33.31mm	168.5	119.5	25.37mm	32.86mm	18.09mm	37.85mm
15\8\2016	m	5.57mm	8.24mm	8.26mm	10.62mm	54.2	38.16mm	8.37mm	41.25mm	11.21mm	11.23mm	59.90mm	32.0mm	172.4	118	20.42mm	28.51mm	17.82mm	35.42mm
4\2\2014	m	5.61mm	7.97mm	7.86mm	11.83mm	59.7	37.01mm	11.82mm	46.53mm	12.42mm	12.43mm	54.46mm	35.06mm	153.8	123.5	19.49mm	25.56mm	8.68mm	42.15mm
9\3\2014	f	5.61mm	7.99mm	8.39mm	10.45mm	58.3	37.27mm	8.08mm	41.00mm	9.22mm	9.20mm	66.46mm	34.60mm	153.8	117.9	28.90mm	33.00mm	11.39mm	40.82mm
15\12\2013	f	5.62mm	7.91mm	8.07mm	10.51mm	58.2	35.25mm	12.04mm	41.57mm	12.70mm	12.71mm	52.71mm	32.34mm	157	115.7	24.95mm	28.55mm	11.66mm	33.51mm
17\5\2015	m	5.64mm	8.26mm	8.31mm	10.82mm	62.1	40.63mm	11.23mm	47.29mm	9.68mm	9.66mm	67.07mm	37.14mm	159.9	117.6	29.23mm	31.31mm	12.11mm	29.72mm
3\2\2013	m	5.65mm	8.48mm	8.36mm	11.06mm	62.1	36.93mm	9.44mm	47.90mm	9.18mm	9.17mm	59.07mm	31.20mm	159.2	117.7	23.50mm	32.11mm	15.99mm	44.90mm
21\9\2016	f	5.68mm	8.36mm	8.32mm	10.80mm	60	36.89mm	8.22mm	46.32mm	8.38mm	8.38mm	62.82mm	37.99mm	137.5	122.7	24.56mm	34.06mm	12.85mm	31.97mm
3\2\014	m	5.69mm	8.72mm	8.23mm	10.66mm	60	35.82mm	9.00mm	43.24mm	16.13mm	16.13mm	53.85mm	35.74mm	150	122.3	24.64mm	28.11mm	9.07mm	40.17mm
10\3\2013	m	5.72mm	7.59mm	7.79mm	9.16mm	75.1	30.60mm	8.27mm	45.49mm	8.86mm	8.86mm	61.31mm	28.16mm	164.8	117.4	24.68mm	27.23mm	12.70mm	32.71mm
11\12\2014	m	5.72mm	8.30mm	9.55mm	11.67mm	69.9	36.74mm	12.69mm	46.25mm	8.43mm	8.43mm	63.06mm	34.30mm	169.1	112.6	23.90mm	29.89mm	17.91mm	41.71mm
9\8\2016	f	5.74mm	7.03mm	8.33mm	11.32mm	59.1	36.46mm	10.94mm	42.71mm	10.33mm	10.32mm	59.94mm	31.99mm	164.1	120.1	20.62mm	28.92mm	12.51mm	39.07mm
22\9\2013	f	5.75mm	7.40mm	7.63mm	9.45mm	56.6	35.12mm	9.82mm	40.18mm	8.32mm	8.32mm	58.66mm	27.76mm	174.4	121.1	23.82mm	29.76mm	11.22mm	33.42mm
13\10\2015	f	5.75mm	7.66mm	7.32mm	9.85mm	62.1	33.29mm	7.90mm	43.27mm	10.59mm	10.60mm	58.88mm	27.74mm	155.4	125.5	24.88mm	28.37mm	13.06mm	35.34mm
5\3\\2013	f	5.78mm	7.94mm	8.23mm	9.79mm	62.7	34.78mm	10.15mm	43.84mm	8.61mm	8.63mm	59.93mm	36.15mm	142.4	121.7	24.70mm	29.21mm	13.80mm	31.20mm
22\9\2013	m	5.78mm	7.85mm	6.85mm	9.44mm	63.5	31.19mm	15.31mm	38.94mm	8.18mm	8.19mm	61.33mm	29.69mm	161.3	115.9	24.65mm	29.03mm	8.03mm	32.32mm
12\2\214	m	5.78mm	7.59mm	8.47mm	11.00mm	62.8	36.01mm	15.62mm	40.06mm	9.75mm	9.70mm	56.26mm	38.39mm	156.7	121.8	28.26mm	31.86mm	19.01mm	35.33mm
3\2\2014	m	5.79mm	8.18mm	8.25mm	11.06mm	64.2	40.63mm	12.10mm	43.22mm	10.68mm	10.70mm	48.98mm	38.38mm	151	118.9	22.95mm	31.36mm	11.08mm	30.02mm
12\9\2012	f	5.80mm	8.11mm	9.20mm	10.65mm	56.8	38.83mm	14.96mm	43.96mm	9.50mm	9.50mm	55.70mm	29.66mm	155.9	123	23.18mm	29.94mm	17.39mm	34.96mm
27\11\2016	f	5.81mm	7.61mm	7.11m	10.20mm	63.8	39.15mm	10.96mm	40.34mm	6.87mm	6.87mm	51.32mm	36.71mm	158.8	125.7	24.19mm	30.12mm	13.62mm	30.08mm
25\11\2014	m	5.82mm	8.49mm	9.67mm	11.44mm	65.3	39.06mm	15.90mm	44.42mm	10.24mm	10.24mm	62.96mm	33.15mm	153.5	122.1	28.55mm	30.81mm	11.21mm	36.39mm
2\11\2015	f	5.83mm	7.89mm	7.79mm	10.53mm	62.7	33.68mm	10.90mm	42.41mm	9.19mm	9.17mm	59.12mm	32.05mm	159.6	118.1	23.96mm	23.86mm	13.03mm	37.74mm
7\9\2016	f	5.84mm	7.24mm	7.53mm	9.89mm	60.7	33.24mm	9.11mm	40.57mm	10.68mm	10.68mm	64.55mm	33.25mm	157.2	125.6	22.18mm	29.18mm	7.47mm	30.80mm
3\2\2014	m	5.84mm	7.80mm	9.05mm	11.53mm	68.8	34.51mm	11.84mm	42.22mm	9.35mm	9.35mm	54.01mm	37.06mm	154.3	122.3	23.86mm	29.01mm	17.10mm	34.64mm
24\11\2015	m	5.87mm	7.92mm	8.46mm	12.06mm	68.4	38.58mm	6.98mm	42.12mm	11.97mm	11.97mm	53.53mm	33.63mm	176.9	110.5	25.84mm	28.76mm	21.90mm	34.58mm
22\6\2016	f	5.89mm	7.86mm	7.85mm	10.36mm	65.7	34.81mm	11.55mm	47.98mm	9.69mm	9.64mm	60.16mm	34.71mm	172.3	117.7	19.76mm	24.96mm	11.50mm	37.86m
21\11\2016	f	5.91mm	7.70mm	7.55mm	10.08mm	69.7	33.58mm	10.98mm	42.02mm	7.96mm	7.96mm	49.58mm	35.11mm	160.6	119.7	22.63mm	26.98mm	11.42mm	33.35mm
18\11\2015	f	5.92mm	8.72mm	9.29mm	12.17mm	67.7	38.12mm	13.45mm	47.84mm	11.67mm	11.66mm	62.46mm	32.36mm	163.3	123.2	29.62mm	31.52mm	17.93mm	36.24mm
5\12\2011	f	5.94mm	8.51mm	7.48mm	10.97mm	67	39.04mm	6.68mm	44.20mm	9.73mm	9.73mm	66.09mm	36.39mm	176.2	107.7	23.49mm	29.69mm	11.08mm	36.27mm
3\3\2014	f	5.94mm	7.63mm	6.90mm	9.34mm	57.1	33.70mm	11.36mm	41.36mm	10.75mm	10.75mm	54.12mm	32.98mm	158.6	119.7	19.95mm	28.52mm	11.36mm	40.54mm
21\11\2013	f	5.94mm	7.70mm	7.62mm	9.97mm	62.9	36.33mm	14.70mm	43.05mm	11.31mm	11.29mm	56.12mm	33.70mm	153.6	111.9	22.70mm	24.09mm	12.04mm	36.53mm
9\6\2014	m	5.97mm	8.23mm	7.86mm	10.59mm	62	37.19mm	11.29mm	48.82mm	10.95mm	10.92mm	58.71mm	48.71mm	156.4	114.1	22.19mm	31.50mm	13.90mm	31.78mm
18\5\2016	f	5.98mm	7.73mm	8.04mm	9.99mm	64.3	35.68mm	12.72mm	41.62mm	12.14mm	12.10mm	58.62mm	28.81mm	171.1	115.9	24.12mm	24.81mm	11.89mm	32.03mm
11\8\2014	m	5.98mm	7.86mm	8.03mm	10.30mm	64.5	40.67mm	13.59mm	46.85mm	11.66mm	11.64mm	59.53mm	34.77mm	171.2	111.3	22.82mm	27.38mm	19.82mm	39.90mm
5\10\2016	f	5.98mm	7.56mm	6.36mm	9.13mm	61	33.98mm	12.74mm	40.71mm	9.51mm	9.55mm	59.03mm	30.77mm	169.7	118.6	23.91mm	31.45mm	14.98mm	32.77mm
8\8\2016	f	6.00mm	7.93mm	8.21mm	9.69mm	not clear	33.80mm	15.56mm	42.56mm	10.55mm	10.55mm	58.71mm	32.29mm	not clear	123.3	24.62mm	33.05mm	10.40mm	33.05mm
2\3\2016	m	6.00mm	9.00mm	7.42mm	10.71mm	62.8	41.66mm	8.31mm	42.74mm	11.75mm	11.73mm	63.55mm	33.81mm	152.6	118.9	20.64mm	29.65mm	10.94mm	42.56mm
11\10\2015	m	6.01mm	8.40mm	8.32mm	11.84mm	60.5	41.17mm	9.79mm	48.66mm	13.84mm	13.88mm	55.65mm	36.26mm	159.7	117.7	27.14mm	29.09mm	17.98mm	38.56mm
25\7\2013	f	6.03mm	8.58mm	8.06mm	9.89mm	59.7	35.41mm	6.80mm	47.67mm	8.24mm	8.23mm	59.79mm	34.43mm	152.6	120.4	26.22mm	26.79mm	12.82mm	36.70mm
31\8\2015	f	6.04mm	8.54mm	7.55mm	10.19mm	63.4	35.82mm	12.56mm	42.72mm	12.84mm	12.84mm	60.75mm	36.51mm	172.9	112.2	26.16mm	28.10mm	17.29mm	43.50mm
8\8\2016	f	6.06mm	7.56mm	7.43mm	9.88mm	66.8	34.44mm	11.87mm	41.0mm	8.82mm	8.80mm	62.07mm	29.77mm	165.7	115.7	25.84mm	31.26mm	8.47mm	39.40mm
1\6\2016	f	6.06mm	8.78mm	7.51mm	10.30mm	64.3	36.50mm	7.84mm	42.25mm	10.05mm	10.03mm	63.16mm	31.89mm	178.3	126.3	22.72mm	29.74mm	18.39mm	32.59mm
14\1\2015	m	6.07mm	8.33mm	9.22mm	12.30mm	61.4	40.75mm	12.76mm	48.83mm	10.79mm	10.79mm	61.16mm	32.98mm	162.4	109.9	23.36mm	32.29mm	11.10mm	37.98mm
25\9\2016	m	6.08mm	7.19mm	9.02mm	11.21mm	67.5	41.39mm	9.71mm	49.29mm	9.78mm	9.79mm	58.05mm	37.36mm	154.3	121.7	22.12mm	31.5mm	13.88mm	40.15mm
28\5\2013	f	6.08mm	8.27mm	8.57mm	11.05mm	65.1	36.43mm	14.71mm	42.33mm	10.08mm	10.08mm	64.70mm	39.91mm	147.7	125.2	24.90mm	29.10mm	16.93mm	36.47mm
1\11\2015	f	6.09mm	8.37mm	8.51mm	10.48mm	62.3	36.38mm	12.89mm	40.69mm	7.52mm	7.54mm	59.96mm	27.47mm	149.8	133.8	24.53mm	28.91mm	15.84mm	33.95mm
16\12\2014	m	6.09mm	8.26mm	8.44mm	11.72mm	65.1	40.73mm	7.87mm	43.88mm	10.25mm	10.23mm	50.60mm	30.58mm	156.6	120.4	24.44mm	34.14mm	16.30mm	37.12mm
27\11\2013	m	6.09mm	8.31mm	9.09mm	12.51mm	67.6	40.60mm	10.19mm	50.04mm	12.69mm	12.66mm	64.72mm	31.66mm	165.8	113.5	21.08mm	29.98mm	9.50mm	40.01mm
2\6\2016	m	6.12mm	8.01mm	8.09mm	10.24mm	59	38.23mm	14.88mm	46.05mm	13.60mm	13.57mm	59.88mm	31.72mm	158.9	119.4	26.16mm	28.18mm	20.81mm	30.43mm
2\9\2012	m	6.13mm	8.54mm	9.33mm	11.32mm	59.7	34.73mm	12.15mm	40.37mm	10.53mm	10.50mm	60.85mm	36.13mm	160.4	111.1	24.51mm	30.09mm	7.24mm	42.16mm
27\2\2014	f	6.13mm	7.25mm	7.62mm	10.73mm	63.7	35.85mm	8.60mm	45.43mm	12.28mm	12.25mm	63.64mm	34.60mm	164.1	116.8	28.76mm	21.10mm	11.43mm	33.01mm
10\2\2015	m	6.15mm	8.48mm	7.87mm	10.43mm	63.5	38..14mm	10.55mm	43.91mm	11.08mm	11.06mm	59.21mm	31.88mm	159.5	120.9	24.57mm	27.58mm	9.70mm	34.80mm
17\9\2014	f	6.15mm	9.06mm	7.45mm	10.25mm	62.7	36.40mm	12.39mm	43.17mm	10.60mm	10.60mm	54.90mm	33.56mm	164.4	125.1	24.25mm	30.06mm	6.47mm	38.65mm
9\3\2104	f	6.15mm	8.08mm	7.42mm	9.63mm	62.4	35.39mm	13.68mm	40.15mm	8.57mm	8.57mm	61.45mm	32.92mm	169.4	119.8	23.63mm	29.75mm	6.51mm	40.60mm
3\3\2013	m	6.16mm	8.16mm	7.61mm	9.83mm	64.3	38.95mm	9.95mm	49.22mm	9.92mm	9.92mm	62.75mm	28.85mm	168.2	119.3	19.11mm	29.74mm	15.78mm	34.99mm
17\11\2016	m	6.16mm	8.02mm	8.15mm	11.30mm	64.5	37.94mm	16.56mm	43.62mm	10.49mm	10.49mm	59.40mm	37.07mm	164	120.5	23.64mm	30.20mm	14.31mm	42.85mm
18\12\2012	m	6.17mm	8.67mm	7.08mm	10.90mm	69.7	36.82mm	12.93mm	40.23mm	8.27mm	8.25mm	65.07mm	33.05mm	172.6	112.2	20.00mm	29.63mm	15.64mm	33.85mm
8\1\2015	m	6.17mm	7.96mm	7.65mm	9.58mm	53.5	46.31mm	13.11mm	36.20mm	12.13mm	12.16mm	64.22mm	34.07mm	167	120.7	25.66mm	28.25mm	7.76mm	37.39mm
27\10\2015	f	6.20mm	8.50mm	8.29mm	10.32mm	58.9	37.30mm	9.39mm	38.75mm	10.09mm	10.10mm	66.71mm	36.46mm	151.8	121.2	28.50mm	28.78mm	14.78mm	37.60mm
1\2\2015	m	6.25mm	8.53mm	9.61mm	11.33mm	65.6	31.31mm	11.69mm	40.76mm	9.05mm	9.06mm	60.01mm	31.49mm	161.1	120.2	24.01mm	29.42mm	12.35mm	40.18mm
13\9\2015	m	6.26mm	9.56mm	7.21mm	11.13mm	65.6	41.37mm	10.74mm	44.51mm	11.14mm	11.16mm	57.22mm	34.74mm	150.8	115	23.00mm	28.01mm	15.82mm	37.07mm
4\8\2016	f	6.29mm	8.31mm	7.55mm	10.01mm	55.9	33.52mm	10.75mm	39.91mm	11.10mm	11.11mm	62.40mm	30.08mm	174	112.3	23.16mm	30.42mm	17.83mm	38.10mm
16\3\2016	f	6.29mm	8.12mm	7.33mm	9.05mm	60.1	35.04mm	13.0mm	42.11mm	8.35mm	8.30mm	58.92mm	31.18mm	174.4	113.2	25.90mm	30.20mm	13.18mm	30.20mm
23\6\2015	f	6.29mm	7.76mm	8.33mm	10.36mm	63.1	38.24mm	9.64mm	44.46mm	9.80mm	9.83mm	62.94mm	34.37mm	155.9	125.1	26.75mm	33.98mm	14.70mm	32.09mm
14\10\2015	m	6.30mm	8.02mm	9.05mm	10.96mm	60.5	42.41mm	14.98mm	41.53mm	11.91mm	11.91mm	61.92mm	36.23mm	167.7	116.4	19.34mm	25.49mm	15.22mm	34.30mm
2\2\2014	m	6.31mm	8.65mm	7.97mm	10.73mm	63.3	35.46mm	15.20mm	48.15mm	12.76mm	12.80mm	62.30mm	27.58mm	157.9	118.9	22.12mm	29.76mm	13.52mm	32.2mm
13\8\2014	f	6.33mm	8.83mm	7.03mm	10.12mm	59.9	38.28mm	10.38mm	50.35mm	10.13mm	10.12mm	62.71mm	31.29mm	156.1	123.4	24.32mm	34.14mm	15.73mm	34.58mm
16\6\2015	f	6.34mm	8.38mm	8.12mm	10.43mm	62.6	37.88mm	9.00mm	47.62mm	9.23mm	9.22mm	56.10mm	31.61mm	156.5	126.9	25.18mm	32.72mm	14.32mm	37.04mm
25\1\2016	m	6.35mm	8.60mm	8.09mm	11.08mm	62.6	41.67mm	9.11mm	48.46mm	10.87mm	10.84mm	62.87mm	34.51mm	171.4	118.6	28.19mm	35.29mm	8.41mm	37.16mm
8\4\2013	m	6.42mm	8.31mm	7.94mm	9.91mm	67.6	32.29mm	9.52mm	39.13mm	9.44mm	9.43mm	64.55mm	30.80mm	150	132.6	20.09mm	31.0mm	13.78mm	36.74mm
31\5\2012	f	6.45mm	7.44mm	7.53mm	9.60mm	65	30.62mm	10.70mm	40.56mm	7.53mm	7.55mm	57.97mm	27.66mm	169.2	123.9	22.54mm	27.75mm	8.14mm	34.99mm
20\10\2014	m	6.45mm	8.61mm	8.65mm	10.89mm	62.1	36.78mm	8.74mm	47.35mm	13.89mm	13.89mm	54.80mm	35.48mm	150.5	119.7	26.63mm	30.86mm	13.10mm	38.01mm
12\2\2014	m	6.45mm	8.60mm	8.14mm	11.21mm	63.1	40.72mm	12.30mm	46.35mm	11.05mm	11.02mm	64.88mm	35.10mm	163.6	113.6	25.54mm	31.68mm	17.38mm	36.15mm
22\4\2014	m	6.47mm	8.22mm	7.52mm	10.28mm	61.9	35.35mm	10.32mm	42.70mm	8.65mm	8.65mm	63.01mm	30.93mm	159.2	122.2	20.35mm	30.33mm	14.83mm	37.33mm
2\3\2016	m	6.48mm	8.46mm	7.80mm	10.86mm	66.5	35.90mm	9.45mm	46.40mm	13.20mm	13.20mm	50.90mm	29.41mm	174.6	117.8	20.81mm	31.16mm	10.44mm	35.15mm
16\3\2016	f	6.48mm	8.18mm	7.77mm	9.97mm	61.7	33.68mm	12.77mm	45.51mm	8.43mm	8.46mm	54.92mm	29.00mm	172.5	113.2	26.67mm	30.56mm	13.48mm	30.18mm
25\8\2016	f	6.50mm	8.35mm	7.70mm	9.62mm	57.3	39.41mm	11.05mm	44.58mm	11.83mm	11.85mm	62.35mm	35.28mm	162.7	121.5	23.83mm	26.85mm	13.91mm	33.68mm
14\1\2015	m	6.51mm	8.87mm	9.51mm	11.84mm	62	43.21mm	14.45mm	45.02mm	12.57mm	12.57mm	67.81mm	30.38mm	163.4	114.2	21.04mm	34.69mm	16.09mm	37.51mm
28\2\2016	m	6.52mm	9.30mm	8.51mm	10.88mm	65.3	37.70mm	8.79mm	50.50mm	9.37mm	9.37mm	59.49mm	36.60mm	158.4	120.1	22.50mm	26.53mm	18.17mm	35.98mm
17\12\2014	f	6.54mm	8.78mm	9.85mm	12.11mm	60.9	38.48mm	9.51mm	39.20mm	9.18mm	9.16mm	67.23mm	30.19mm	146.1	128	29.75mm	32.18mm	14.05mm	35.12mm
17\4\2013	f	6.57mm	8.43mm	7.62mm	9.49mm	60.7	38.21mm	7.51mm	40.68mm	10.46mm	10.46m	68.60mm	29.18mm	171.4	113.7	25.71mm	29.14mm	15.48mm	32.68mm
15\5\2014	m	6.60mm	9.90mm	7.94mm	11.56mm	57.9	38.19mm	8.61mm	47.64mm	12.52mm	12.54mm	53.20mm	35.16mm	176.2	120	26.85mm	31.96mm	18.16mm	36.31mm
30\8\2015	m	6.64mm	8.46mm	8.34mm	11.61mm	62.7	41.71mm	10.85mm	40.88mm	11.11mm	11.11mm	61.58mm	34.23mm	171.8	112.8	29.33mm	32.69mm	16.76mm	33.52mm
2\11\2016	m	6.64mm	8.93mm	7.13mm	10.82mm	56.2	39.91mm	12.92mm	45.61mm	12.29mm	12.30mm	56.90mm	33.98mm	173.1	119.3	24.05mm	29.81mm	11.68mm	38.48mm
9\2\216	m	6.65mm	8.16mm	8.92mm	10.67mm	64.9	34.45mm	14.04mm	38.52mm	9.75mm	9.75mm	57.96mm	29.01mm	167.7	119	25.87mm	27.73mm	16.51mm	35.12mm
21\8\2014	f	6.65mm	8.53mm	7.87mm	10.44mm	57	35.26mm	14.63mm	40.04mm	9.80mm	9.81mm	61.06mm	30.47mm	146.1	124.5	24.02mm	26.10mm	16.20mm	34.42mm
27\1\2016	m	6.66mm	8.40mm	7.53mm	10.54mm	69.1	38.69mm	12.91mm	50.45mm	11.93mm	11.96mm	58.46mm	39.62mm	172.5	110.9	21.00mm	28.02mm	16.11mm	37.46mm
15\9\2015	m	6.66mm	9.27mm	9.51mm	11.89mm	58.1	41.31mm	8.32mm	45.39mm	10.52mm	10.49mm	63.26mm	33.29mm	168.9	119.5	21.00mm	27.11mm	17.53mm	37.06mm
9\12\2014	m	6.66mm	8.60mm	8.36mm	11.18mm	55.3	37.37mm	9.92mm	44.32mm	13.28mm	13.28mm	62.00mm	35.27mm	159.5	126.8	19.88mm	27.72mm	9.45mm	39.53mm
7\11\2016	m	6.76mm	8.65mm	8.97mm	11.67mm	64.4	41.72mm	8.37mm	46.06mm	11.24mm	11.21mm	58.62mm	37.22mm	162.6	120.9	23.46mm	32.55mm	20.60mm	43.57mm
3\9\2014	f	6.79mm	8.55mm	8.11mm	10.53mm	60	36.30mm	10.24mm	43.47mm	11.10mm	11.07mm	60.32mm	33.09mm	172.7	119.7	22.95mm	25.97mm	8.72mm	40.09mm
22\9\2014	f	6.95mm	8.16mm	8.23mm	10.48mm	67.6	37.40mm	12.72mm	44.57mm	9.13mm	9.17mm	61.31mm	35.58mm	166.8	116.4	30.49mm	32.48mm	16.91mm	35.02mm
9\5\2016	f	6.97mm	9.73mm	8.71mm	11.95mm	68.6	40.18mm	9.73mm	46.05mm	11.51mm	11.51mm	69.69mm	34.45mm	161	117.6	24.06mm	33.79mm	13.05mm	37.64mm
16\9\2014	f	7.02mm	9.74mm	7.66mm	10.31mm	66.4	36.87mm	8.76mm	48.30mm	10.53mm	10.55mm	62.90mm	36.09mm	141.7	130.2	24.20mm	26.82mm	17.57mm	36.09mm
14\6\2015	f	7.14mm	8.92mm	9.68mm	12.34mm	65	39.01mm	13.48mm	47.24mm	11.75mm	11.74mm	61.68mm	29.07mm	164.9	119.6	28.63mm	29.80mm	17.31mm	34.98mm
17\12\2012	m	7.23mm	8.96mm	10.71mm	12.52mm	62.3	43.59mm	16.15mm	40.70mm	11.61mm	11.61mm	65.65mm	32.90mm	172.5	114.3	23.13mm	29.08mm	11.93mm	44.74mm
3\12\2013	m	7.24mm	9.12mm	10.31mm	12.35m	63.8	44.35mm	13.62mm	47.22mm	12.73mm	12.73mm	64.41mm	34.24mm	169.5	114	24.36mm	34.29mm	21.46mm	42.17mm
25\10\2015	f	7.27mm	9.02mm	8.09mm	10.58mm	68.7	39.90mm	9.91mm	43.33mm	10.46mm	10.42mm	56.43mm	34.39mm	153	124.2	25.75mm	33.30mm	13.51mm	37.60mm
22\2\20016	m	7.49mm	8.96mm	8.64mm	11.43mm	66.1	40.53mm	10.07mm	41.68mm	12.46mm	12.42mm	60.62mm	31.08mm	150.4	122	27.57mm	30.10mm	18.08mm	35.21mm
14\4\2014	m	7.51mm	8.65mm	8.12mm	10.44mm	61.5	38.34mm	9.78mm	42.02mm	11.28mm	11.28mm	64.11mm	36.78mm	166.4	125.7	22.45mm	30.44mm	19.73mm	36.30mm
18\9\2014	m	7.52mm	9.52mm	9.64mm	12.12mm	58.1	44.33mm	9.41mm	47.65mm	11.33mm	11.36mm	59.42mm	35.91mm	168.1	113.5	26.42mm	24.74mm	17.41mm	35.33mm
30\3\2016	m	7.59mm	9.53mm	10.12mm	12.15mm	67.4	39.74mm	8.28mm	48.27mm	13.41mm	13.41mm	59.69mm	39.20mm	175	111.4	22.69mm	31.37mm	13.99mm	39.09mm
29\10\2014	m	7.66mm	9.16mm	9.31mm	11.51mm	64.7	36.23mm	10.37mm	47.45mm	11.63mm	11.60mm	68.16mm	31.38mm	145	126	25.17mm	32.63mm	15.74mm	37.69mm
15\12\2014	m	7.76mm	9.95mm	9.94mm	12.29mm	56.8	41.12mm	9.30mm	46.06mm	12.22mm	12.26mm	52.97mm	31.06mm	174.4	118.2	23.57mm	36.95mm	21.15mm	41.14mm
32\10\2016	m	8.09mm	9.14mm	9.52mm	12.21mm	67.7	41.79mm	8.78mm	43.98mm	11.05mm	11.05mm	63.49mm	34.44mm	156.6	119.6	25.03mm	36.80mm	15.41mm	35.49mm
2\10\2014	m	8.34mm	9.36mm	9.25mm	11.77mm	60.6	37.73mm	7.92mm	47.03mm	11.10mm	11.10mm	67.31mm	33.89mm	175.2	121.3	24.66mm	33.16mm	14.44mm	41.30mm
23\10\2013	f	8.35mm	10.50mm	8.45mm	10.81mm	54.2	40.36mm	8.29mm	41.0mm	9.62mm	9.62mm	62.58mm	36.26mm	162.4	125.7	21.29mm	24.79mm	15.62mm	28.54mm
